# Supplementary material for: A highly birefringent metal-free crystal assembled by cooperative non-covalent interactions
Source: Royal Society of Chemistry journal article supplement (doi:10.1039/d4mh00422a), 2024-01-01
Supplement: d4mh00422a1.pdf [file d4mh00422a1.pdf]

## Supplementary Information for

# A Highly Birefringent Metal-Free Crystal Assembled by Cooperative Non-Covalent Interactions

Yanqiang Li,<sup>1</sup> Yang Zhou,<sup>1,2</sup> Belal Ahmed,<sup>1,4</sup> Qianting Xu,<sup>1</sup> Weiqi Huang,<sup>1</sup> Yipeng Song,<sup>1,2</sup> Xianyu Song,<sup>1</sup> Bin Chen,<sup>1</sup> Junhua Luo<sup>1,2,3</sup> Sangen Zhao<sup>\*,1,2,3</sup>

<sup>1</sup>State Key Laboratory of Structural Chemistry, Fujian Institute of Research on the Structure of Matter, Chinese Academy of Sciences, Fuzhou, Fujian 350002, China

<sup>2</sup>University of Chinese Academy of Sciences, Beijing 100049, China

<sup>3</sup>Fujian Science & Technology Innovation Laboratory for Optoelectronic Information of China, Fujian 350108, China

\*Correspondence to: zhaosangen@fjirsm.ac.cn

## CONTENTS

|                                                                                                                                                                                                                                                                                                                                                                          |    |
|--------------------------------------------------------------------------------------------------------------------------------------------------------------------------------------------------------------------------------------------------------------------------------------------------------------------------------------------------------------------------|----|
| Reagents .....                                                                                                                                                                                                                                                                                                                                                           | 3  |
| Synthesis .....                                                                                                                                                                                                                                                                                                                                                          | 3  |
| Single-Crystal Structure Determination.....                                                                                                                                                                                                                                                                                                                              | 3  |
| Powder XRD Analysis .....                                                                                                                                                                                                                                                                                                                                                | 4  |
| Thermal Stability .....                                                                                                                                                                                                                                                                                                                                                  | 4  |
| Semiquantitative microprobe analysis .....                                                                                                                                                                                                                                                                                                                               | 4  |
| XPS Analysis .....                                                                                                                                                                                                                                                                                                                                                       | 4  |
| FTIR Analysis .....                                                                                                                                                                                                                                                                                                                                                      | 5  |
| Raman Analysis .....                                                                                                                                                                                                                                                                                                                                                     | 5  |
| UV–Vis–NIR Diffuse Reflectance Spectroscopy .....                                                                                                                                                                                                                                                                                                                        | 5  |
| Birefringence Tests .....                                                                                                                                                                                                                                                                                                                                                | 5  |
| Theoretical Calculations .....                                                                                                                                                                                                                                                                                                                                           | 6  |
| Figure S1. The photograph of as-synthesized $\text{NH}_4(\text{H}_2\text{C}_6\text{N}_7\text{O}_3)\cdot 2\text{H}_2\text{O}$ crystals.....                                                                                                                                                                                                                               | 7  |
| Figure S2. Experimental and simulated powder XRD patterns of $\text{NH}_4(\text{H}_2\text{C}_6\text{N}_7\text{O}_3)\cdot 2\text{H}_2\text{O}$ .....                                                                                                                                                                                                                      | 7  |
| Figure S3. The original single crystal of $\text{NH}_4(\text{H}_2\text{C}_6\text{N}_7\text{O}_3)\cdot 2\text{H}_2\text{O}$ and the corresponding single crystal exposed to the air at room temperature for one day, three days, and five days observed under the optical microscope. ....                                                                                | 8  |
| Figure S4. TG and DTA curves of $\text{NH}_4(\text{H}_2\text{C}_6\text{N}_7\text{O}_3)\cdot 2\text{H}_2\text{O}$ .....                                                                                                                                                                                                                                                   | 8  |
| Figure S5. EDS result of $\text{NH}_4(\text{H}_2\text{C}_6\text{N}_7\text{O}_3)\cdot 2\text{H}_2\text{O}$ . ....                                                                                                                                                                                                                                                         | 9  |
| Figure S6. The elemental mapping. Scale bar, 200 $\mu\text{m}$ . ....                                                                                                                                                                                                                                                                                                    | 9  |
| Figure S7. (a) The XPS survey scan for $\text{NH}_4(\text{H}_2\text{C}_6\text{N}_7\text{O}_3)\cdot 2\text{H}_2\text{O}$ . (b), (c), and (d) High-resolution XPS spectra of C 1s, N 1s, and O 1s. ....                                                                                                                                                                    | 10 |
| Figure S8. FTIR of $\text{NH}_4(\text{H}_2\text{C}_6\text{N}_7\text{O}_3)\cdot 2\text{H}_2\text{O}$ .....                                                                                                                                                                                                                                                                | 10 |
| Figure S9. Raman spectrum of $\text{NH}_4(\text{H}_2\text{C}_6\text{N}_7\text{O}_3)\cdot 2\text{H}_2\text{O}$ .....                                                                                                                                                                                                                                                      | 11 |
| Figure S10. The crystal orientation of the selected $\text{NH}_4(\text{H}_2\text{C}_6\text{N}_7\text{O}_3)\cdot 2\text{H}_2\text{O}$ plate determined by single-crystal XRD. ....                                                                                                                                                                                        | 11 |
| Figure S11. The UV–Vis–NIR diffuse reflectance spectrum of $\text{NH}_4(\text{H}_2\text{C}_6\text{N}_7\text{O}_3)\cdot 2\text{H}_2\text{O}$ . The inset represents the experiment bandgap.....                                                                                                                                                                           | 12 |
| Figure S12. Polarizability anisotropy of $\pi$ -conjugated birefringent functional units $(\text{BO}_3)^{3-}$ , $(\text{CO}_3)^{2-}$ , $(\text{NO}_3)^-$ , $(\text{B}_3\text{O}_6)^{3-}$ , $(\text{C}_3\text{N}_3\text{O}_3)^{3-}$ , $(\text{C}_3\text{H}_8\text{N}_6)^{2+}$ , $(\text{C}_4\text{O}_4)^{2-}$ , and $(\text{H}_2\text{C}_6\text{N}_7\text{O}_3)^-$ . .... | 12 |
| Table S1. Crystal data and structure refinement for $\text{NH}_4(\text{H}_2\text{C}_6\text{N}_7\text{O}_3)\cdot 2\text{H}_2\text{O}$ .....                                                                                                                                                                                                                               | 13 |
| Table S2. Atomic coordinates ( $\times 10^{-4}$ ) and equivalent isotropic displacement parameters ( $\text{\AA}^2 \times 10^3$ ) for $\text{NH}_4(\text{H}_2\text{C}_6\text{N}_7\text{O}_3)\cdot 2\text{H}_2\text{O}$ .....                                                                                                                                             | 14 |
| Table S3. Anisotropic displacement parameters ( $\text{\AA}^2 \times 10^{-3}$ ) for $\text{NH}_4(\text{H}_2\text{C}_6\text{N}_7\text{O}_3)\cdot 2\text{H}_2\text{O}$ . ....                                                                                                                                                                                              | 16 |
| Table S4. Selected bond lengths ( $\text{\AA}$ ) for $\text{NH}_4(\text{H}_2\text{C}_6\text{N}_7\text{O}_3)\cdot 2\text{H}_2\text{O}$ . ....                                                                                                                                                                                                                             | 18 |
| Table S5. Selected bond angles ( $^\circ$ ) for $\text{NH}_4(\text{H}_2\text{C}_6\text{N}_7\text{O}_3)\cdot 2\text{H}_2\text{O}$ .....                                                                                                                                                                                                                                   | 19 |
| References.....                                                                                                                                                                                                                                                                                                                                                          | 20 |

## Reagents

Melamine (Adamas, 99%) and KOH (Greagent,  $\geq 90\%$ ) were purchased from Tansoole.  $\text{NH}_3 \cdot \text{H}_2\text{O}$  (25.0%–28.0%) and HCl (36.0%–38.0%) were purchased from Sinopharm Chemical Reagent Co., Ltd.

## Synthesis

Firstly, bulk melon was obtained by the traditional solid-state method. The as-purchased melamine was thoroughly ground, slowly heated to 523 K at a rate of  $2 \text{ K min}^{-1}$ , and sintered at 523 K for 540 min. The sample was further heated to 658 K at a rate of  $1 \text{ K min}^{-1}$ , and sintered at 658 K for about 3000 min, resulting in the formation of a light-yellow final product. Secondly,  $\text{K}_3\text{C}_6\text{N}_7\text{O}_3 \cdot 3\text{H}_2\text{O}^1$  was synthesized according to the previous report through refluxing melon powder in KOH aqueous solution (2.5 M). After that,  $\text{H}_3\text{C}_6\text{N}_7\text{O}_3 \cdot 3\text{H}_2\text{O}^2$  was synthesized by mixing the solution of  $\text{K}_3\text{C}_6\text{N}_7\text{O}_3 \cdot 3\text{H}_2\text{O}$  and HCl. Subsequently,  $\text{NH}_3 \cdot \text{H}_2\text{O}$  was added drop-wise to the  $\text{H}_3\text{C}_6\text{N}_7\text{O}_3 \cdot 3\text{H}_2\text{O}$  solution, and the resulting solution was evaporated at room temperature. Colorless  $\text{NH}_4(\text{H}_2\text{C}_6\text{N}_7\text{O}_3) \cdot 2\text{H}_2\text{O}$  crystals were successfully grown after several weeks.

## Single-Crystal Structure Determination

A colorless slice-shaped  $\text{NH}_4(\text{H}_2\text{C}_6\text{N}_7\text{O}_3) \cdot 2\text{H}_2\text{O}$  crystal with dimensions  $0.12 \times 0.09 \times 0.02 \text{ mm}^3$  was selected for the single-crystal X-ray diffraction (XRD) analysis using an optical microscope. The diffraction data was collected using graphite-monochromatized Cu  $K\alpha$  radiation ( $\lambda = 1.54184 \text{ \AA}$ ) at 200(2) K with a SuperNova, Dual, Cu at home/near, Atlas diffractometer. The intensity data collection, cell refinement, and data reduction were performed using the CrysAlisPro software (Rigaku, V1.171.41.116a, 2021). Using Olex2,<sup>3,4</sup> the crystal structure was solved with the SHELXS<sup>5</sup> structure solution program using Direct Methods and refined with the Olex2.refine package using NoSpherA2,<sup>6</sup> an implementation of non-spherical atomic form factors in Olex2. All non-hydrogen atoms were refined anisotropically. Most hydrogen atom positions were calculated geometrically and refined using the riding model, but some hydrogen atoms were refined freely. Final refinements include anisotropic displacement parameters. The final crystal structure was verified by the ADDSYM algorithm from the PLATON program,<sup>7</sup> and no

higher symmetry was found. Detailed crystal parameters, data collection, and structure refinement were summarized in Table S1. The atomic coordinates and equivalent isotropic displacement parameters were listed in Table S2. The anisotropic displacement parameters were listed in Table S3. Selected bond lengths and bond angles were presented in Table S4 and S5.

### **Powder XRD Analysis**

Powder XRD measurements of the  $\text{NH}_4(\text{H}_2\text{C}_6\text{N}_7\text{O}_3) \cdot 2\text{H}_2\text{O}$  sample were carried out on a Rigaku SmartLab high-resolution XRD with the SmartLab Studio II software. The  $2\theta$  range was  $7^\circ$ – $70^\circ$  with a scan step width of  $0.01^\circ$  and a scanning rate of  $3^\circ \text{ min}^{-1}$ .

### **Thermal Stability**

The thermal stability of  $\text{NH}_4(\text{H}_2\text{C}_6\text{N}_7\text{O}_3) \cdot 2\text{H}_2\text{O}$  was investigated by the thermogravimetric (TG) and differential thermal analysis (DTA) on a NETZSCH STA 449F5 simultaneous thermal analyzer instrument. The powder samples of  $\text{NH}_4(\text{H}_2\text{C}_6\text{N}_7\text{O}_3) \cdot 2\text{H}_2\text{O}$  were placed in the  $\text{Al}_2\text{O}_3$  crucible, heated at a rate of  $15 \text{ K min}^{-1}$  from room temperature to 1173 K. The measurement was carried out in an atmosphere of  $\text{N}_2$  flowing.

### **Semiquantitative microprobe analysis**

Semiquantitative microprobe analysis on the  $\text{NH}_4(\text{H}_2\text{C}_6\text{N}_7\text{O}_3) \cdot 2\text{H}_2\text{O}$  crystal was conducted using a field emission scanning electron microscope (SEM) (Hitachi SU8010) equipped with energy dispersive X-ray spectroscopy (EDS). The EDS data was collected on clean surfaces of the samples, confirming the presence of C, N, and O elements. In addition, the SEM elemental mapping of the  $\text{NH}_4(\text{H}_2\text{C}_6\text{N}_7\text{O}_3) \cdot 2\text{H}_2\text{O}$  single crystal was also collected on the field emission SEM.

### **XPS Analysis**

The X-ray photoelectron spectroscopy (XPS) was operated on the ESCALAB 250Xi XPS instrument by using  $\text{Al K}\alpha$  radiation as the source.

### FTIR Analysis

Fourier transform infrared spectroscopy (FTIR) in the wavenumber range of 4000–400  $\text{cm}^{-1}$  was recorded on the Bruker Vertex 70 infrared spectrometer.

### Raman Analysis

Raman spectroscopy between 3500 and 50  $\text{cm}^{-1}$  range was collected on a LabRAM HR Evolution Raman microscope (HORIBA Scientific) with a solid-state laser corresponding to the green light ( $\lambda = 532 \text{ nm}$ ).

### UV–Vis–NIR Diffuse Reflectance Spectroscopy

The UV–Vis–NIR diffuse reflection data was recorded at room temperature using a powdered  $\text{BaSO}_4$  sample as a standard (100% reflectance) on a PerkinElmer Lamda-950 UV–Vis–NIR spectrophotometer.

The scanning wavelength range is from 200 nm to 1000 nm. Absorption ( $K/S$ ) data was calculated from the following Kubelka–Munk function<sup>8</sup>:

$$F(R) = (1 - R)^2 / (2R) = K/S \quad \text{Eq(1)}$$

$R$  is the reflectance,  $K$  is the absorption, and  $S$  is the scattering.

### Birefringence Tests

The birefringence of  $\text{NH}_4(\text{H}_2\text{C}_6\text{N}_7\text{O}_3) \cdot 2\text{H}_2\text{O}$  was characterized by the polarized method under the polarized microscope (Nikon ECLIPSE LV100N POL) equipped with a Berek compensator at  $\lambda = 550 \text{ nm}$ . The relative error is small enough because of the clear boundary lines of the first-, second-, and third-order interference color. In order to improve the accuracy of the birefringence, the small and transparent  $\text{NH}_4(\text{H}_2\text{C}_6\text{N}_7\text{O}_3) \cdot 2\text{H}_2\text{O}$  crystals were chosen. The formula for calculating the birefringence is listed below:<sup>9,10</sup>

$$R = |n_e - n_o| \times T = \Delta n \times T \quad \text{Eq(2)}$$

Here,  $R$  represents the optical path difference,  $\Delta n$  is the birefringence, and  $T$  denotes the thickness of the tested crystal.

## Theoretical Calculations

First-principles calculations were conducted using the CASTEP software,<sup>11</sup> a plane-wave pseudopotential package<sup>12</sup> on the basis of the density functional theory (DFT).<sup>13</sup> The exchange–correlation energy was described by the generalized gradient approximation (GGA) scheme of Perdew–Burke–Ernzerhof (PBE) functional, as implemented in the CASTEP code.<sup>14</sup> Before the calculation, atomic positions in the unit cell have been fully geometrically optimized with the aid of the Broyden–Fletcher–Goldfarb–Shannon (BFGS) algorithm.<sup>15</sup> Norm-conserving pseudopotentials were employed to simulate the ion–electron interactions for each atomic specie with following valence configurations: H  $1s^1$ ; C  $2s^2 2p^2$ ; N  $2s^2 2p^3$ ; O  $2s^2 2p^4$ .<sup>16</sup> A cutoff energy of 1200 eV and the Monkhorst–Pack<sup>17</sup>  $k$ -point meshes ( $4 \times 1 \times 6$ ) spacing less than  $0.03 \text{ \AA}^{-1}$  in the Brillouin zone were chosen for the calculation. Herein, all calculations were performed without the scissors operator. The linear optical properties were examined based on the dielectric function  $\varepsilon$ , defined by  $\varepsilon = N^2$ , where  $N = n - ik$ . Herein,  $N$  represents the complex refractive index,  $n$  represents the refractive index, and  $k$  represents the extinction coefficient.

To explore the polarizability anisotropy of  $(\text{H}_2\text{C}_6\text{N}_7\text{O}_3)^-$  and other similar  $\pi$ -conjugated birefringent functional units, systematic calculations were implemented via the Gaussian 09 package<sup>18</sup> with the hybrid B3LYP functional at 6-31G(d,p) level. After that, the calculation results were analyzed by the Multiwfn 3.8 code.<sup>19</sup>

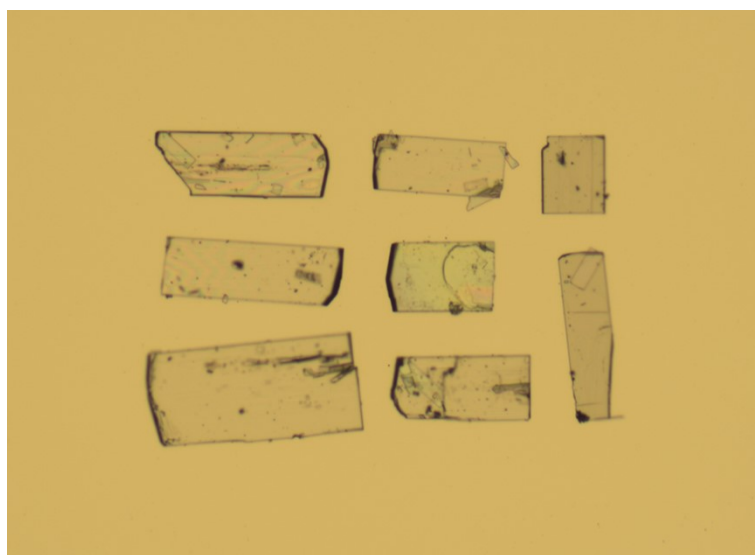

**Figure S1.** The photograph of as-synthesized  $\text{NH}_4(\text{H}_2\text{C}_6\text{N}_7\text{O}_3)\cdot 2\text{H}_2\text{O}$  crystals.

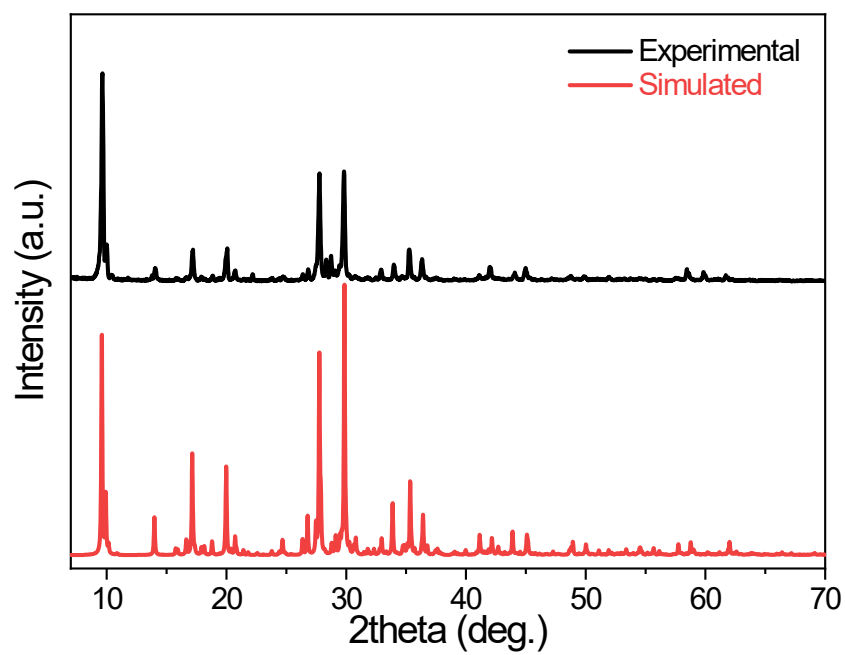

**Figure S2.** Experimental and simulated powder XRD patterns of  $\text{NH}_4(\text{H}_2\text{C}_6\text{N}_7\text{O}_3)\cdot 2\text{H}_2\text{O}$ .

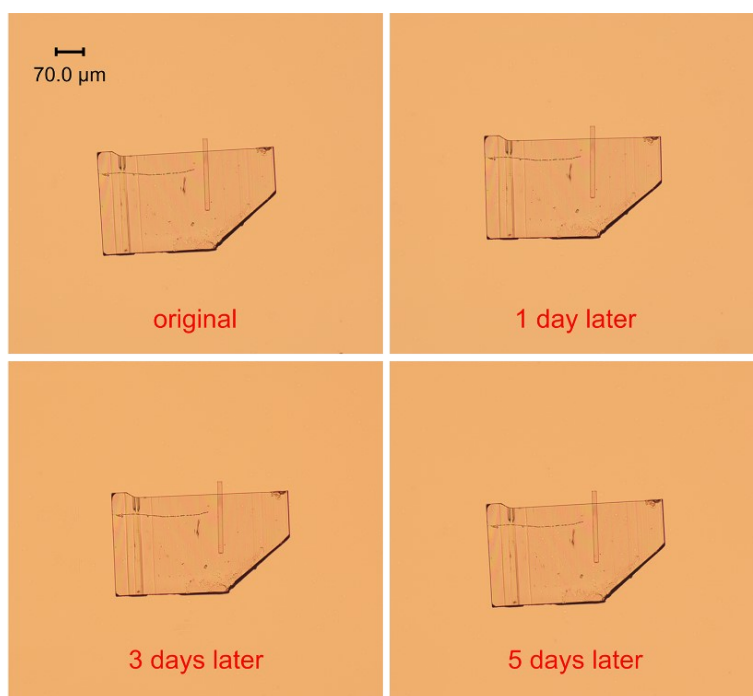

**Figure S3.** The original single crystal of  $\text{NH}_4(\text{H}_2\text{C}_6\text{N}_7\text{O}_3) \cdot 2\text{H}_2\text{O}$  and the corresponding single crystal exposed to the air at room temperature for one day, three days, and five days observed under the optical microscope.

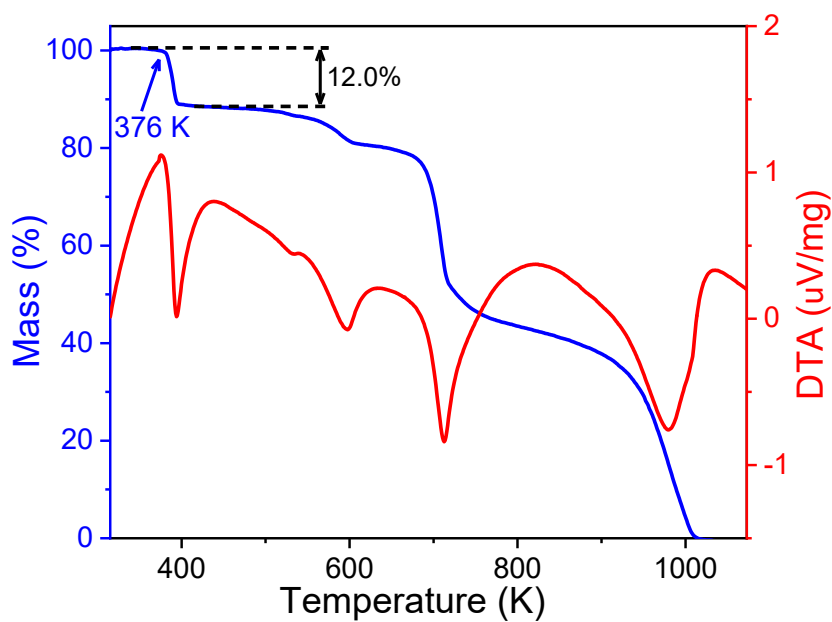

**Figure S4.** TG and DTA curves of  $\text{NH}_4(\text{H}_2\text{C}_6\text{N}_7\text{O}_3) \cdot 2\text{H}_2\text{O}$ .



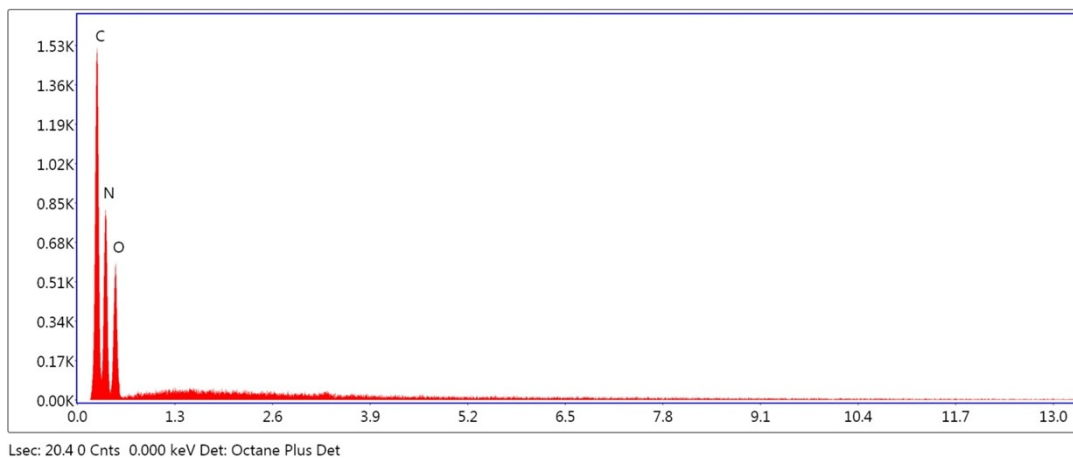

**Figure S5.** EDS result of  $\text{NH}_4(\text{H}_2\text{C}_6\text{N}_7\text{O}_3)\cdot 2\text{H}_2\text{O}$ .

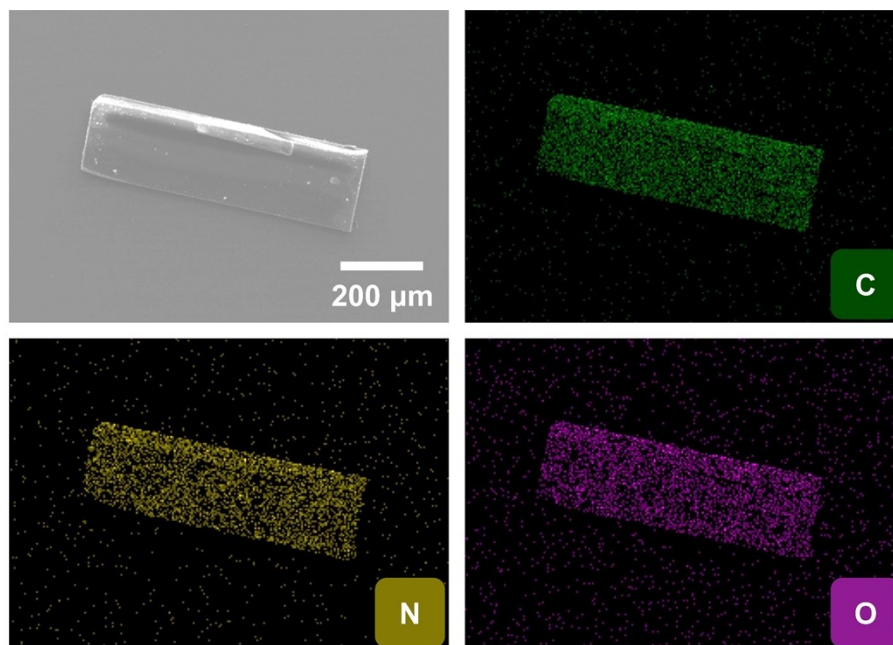

**Figure S6.** The elemental mapping. Scale bar, 200  $\mu\text{m}$ .

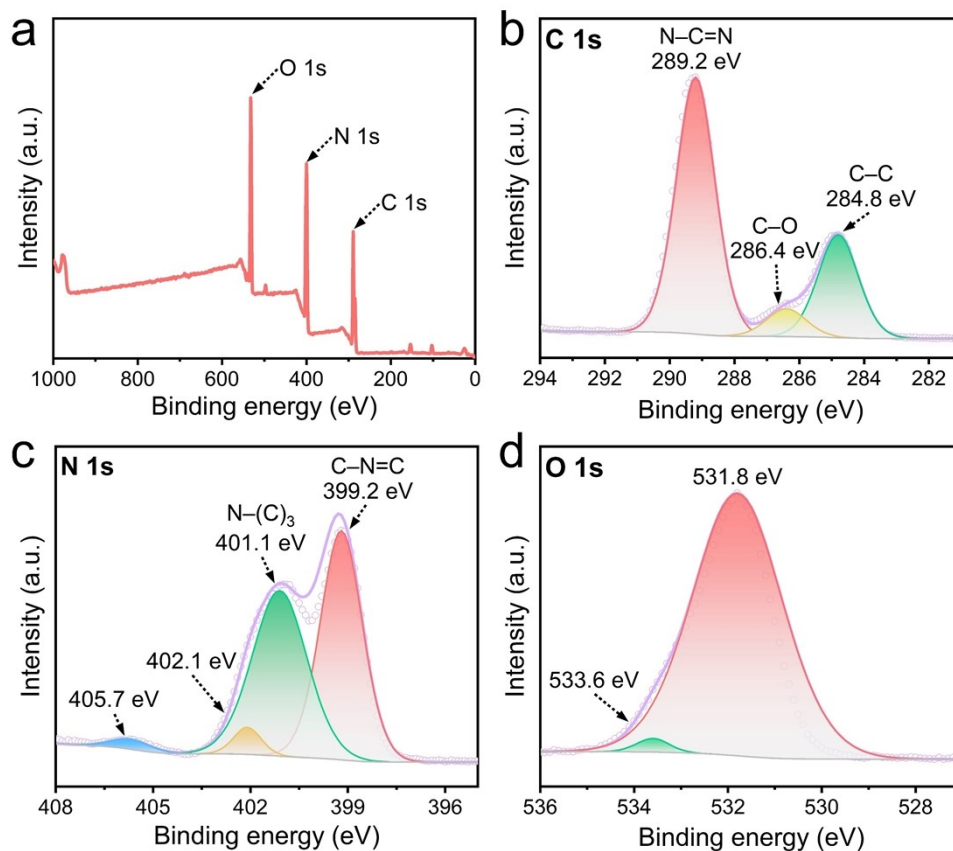

**Figure S7.** (a) The XPS survey scan for  $\text{NH}_4(\text{H}_2\text{C}_6\text{N}_7\text{O}_3)\cdot 2\text{H}_2\text{O}$ . (b), (c), and (d) High-resolution XPS spectra of C 1s, N 1s, and O 1s.

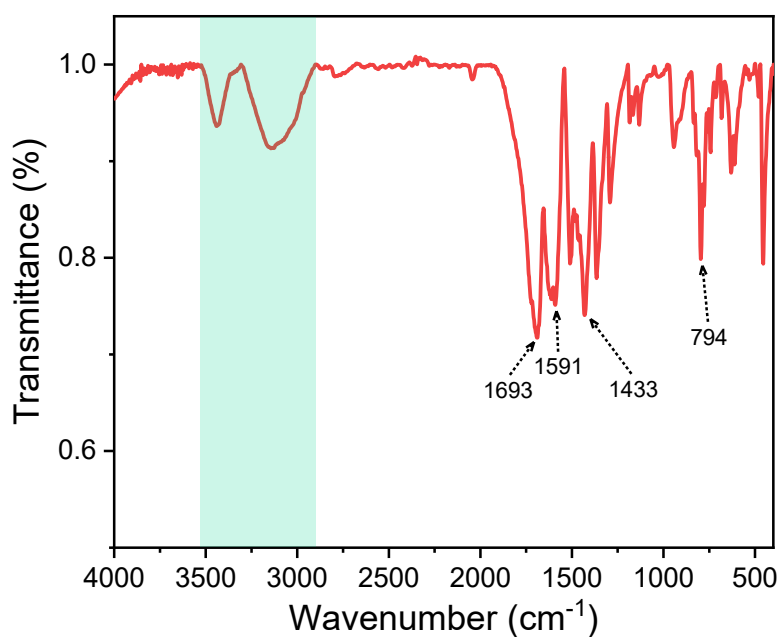

**Figure S8.** FTIR of  $\text{NH}_4(\text{H}_2\text{C}_6\text{N}_7\text{O}_3)\cdot 2\text{H}_2\text{O}$ .

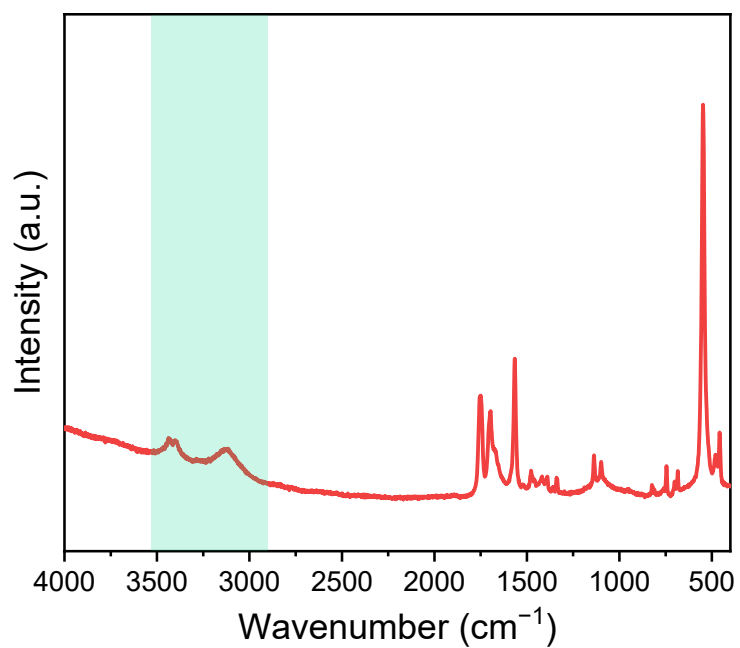

**Figure S9.** Raman spectrum of  $\text{NH}_4(\text{H}_2\text{C}_6\text{N}_7\text{O}_3) \cdot 2\text{H}_2\text{O}$ .

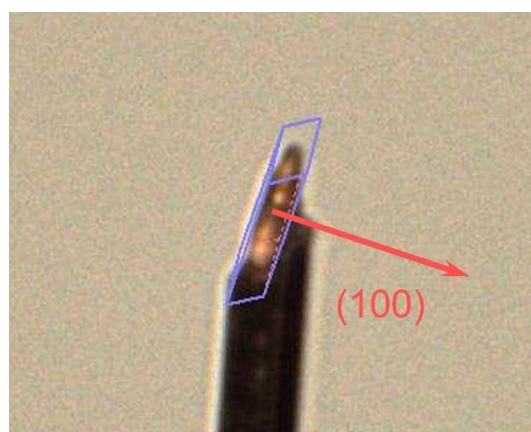

**Figure S10.** The crystal orientation of the selected  $\text{NH}_4(\text{H}_2\text{C}_6\text{N}_7\text{O}_3) \cdot 2\text{H}_2\text{O}$  plate determined by single-crystal XRD.

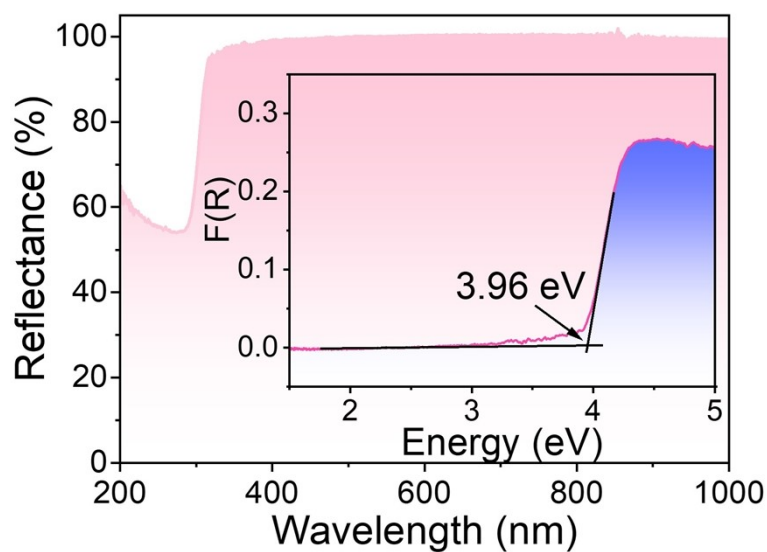

**Figure S11.** The UV–Vis–NIR diffuse reflectance spectrum of  $\text{NH}_4(\text{H}_2\text{C}_6\text{N}_7\text{O}_3)\cdot 2\text{H}_2\text{O}$ . The inset represents the experiment bandgap.

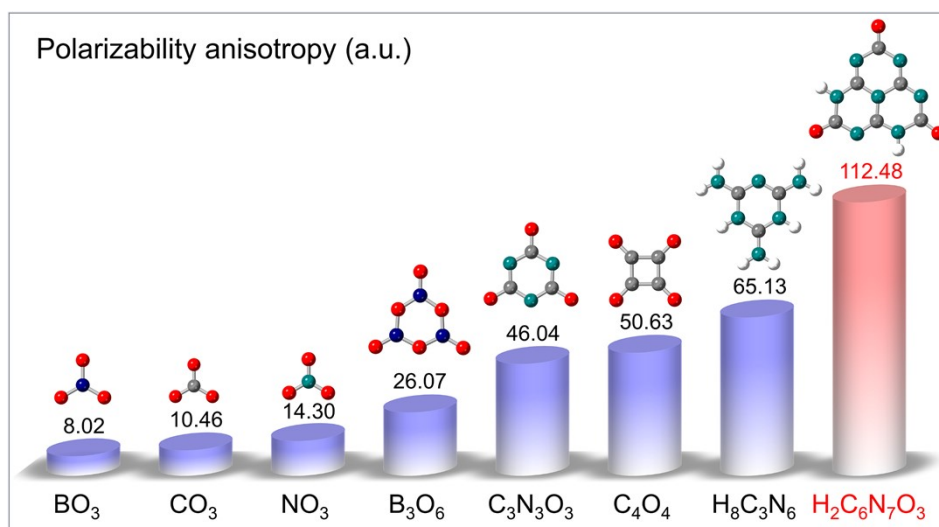

**Figure S12.** Polarizability anisotropy of  $\pi$ -conjugated birefringent functional units  $(\text{BO}_3)^{3-}$ ,  $(\text{CO}_3)^{2-}$ ,  $(\text{NO}_3)^-$ ,  $(\text{B}_3\text{O}_6)^{3-}$ ,  $(\text{C}_3\text{N}_3\text{O}_3)^{3-}$ ,  $(\text{C}_3\text{H}_8\text{N}_6)^{2+}$ ,  $(\text{C}_4\text{O}_4)^{2-}$ , and  $(\text{H}_2\text{C}_6\text{N}_7\text{O}_3)^-$ .

**Table S1.** Crystal data and structure refinement for  $\text{NH}_4(\text{H}_2\text{C}_6\text{N}_7\text{O}_3) \cdot 2\text{H}_2\text{O}$ .

|                                                          |                                                                                   |
|----------------------------------------------------------|-----------------------------------------------------------------------------------|
| Empirical formula                                        | $\text{NH}_4(\text{H}_2\text{C}_6\text{N}_7\text{O}_3) \cdot 2\text{H}_2\text{O}$ |
| Formula weight                                           | 274.22                                                                            |
| Shape                                                    | slice-shaped                                                                      |
| Size/ $\text{mm}^3$                                      | $0.12 \times 0.09 \times 0.02$                                                    |
| Temperature/K                                            | 200(2)                                                                            |
| Crystal system                                           | monoclinic                                                                        |
| Space group                                              | $P2_1/c$                                                                          |
| $a/\text{\AA}$                                           | 9.2242(2)                                                                         |
| $b/\text{\AA}$                                           | 34.8178(7)                                                                        |
| $c/\text{\AA}$                                           | 6.42910(1)                                                                        |
| $\alpha/^\circ$                                          | 90                                                                                |
| $\beta/^\circ$                                           | 92.597(2)                                                                         |
| $\gamma/^\circ$                                          | 90                                                                                |
| Volume/ $\text{\AA}^3$                                   | 2062.69(7)                                                                        |
| $Z$                                                      | 4                                                                                 |
| $Z'$                                                     | 1                                                                                 |
| $\rho(\text{g cm}^{-3})$                                 | 1.766                                                                             |
| $\mu/\text{mm}^{-1}$                                     | 1.338                                                                             |
| F(000)                                                   | 1136.0                                                                            |
| Radiation                                                | Cu $K\alpha$ ( $\lambda = 1.54184 \text{\AA}$ )                                   |
| $2\theta$ range for data collection/ $^\circ$            | 9.598 to 144.83                                                                   |
| Index ranges                                             | $-11 \leq h \leq 11, -42 \leq k \leq 40, -7 \leq l \leq 5$                        |
| Reflections collected                                    | 9189                                                                              |
| Independent reflections                                  | 3980 ( $R_{\text{int}} = 0.0272, R_{\text{sigma}} = 0.0268$ )                     |
| Data/restraints/parameters                               | 3980/3/524                                                                        |
| Goodness-of-fit on $F^2$                                 | 1.0939                                                                            |
| Final $R$ indexes [ $I \geq 2\sigma(I)$ ] <sup>[a]</sup> | $R_1 = 0.0241, wR_2 = 0.0625$                                                     |
| Final $R$ indexes [all data] <sup>[a]</sup>              | $R_1 = 0.0312, wR_2 = 0.0669$                                                     |
| Largest diff. peak/hole / $e \text{\AA}^{-3}$            | 0.24/−0.19                                                                        |

<sup>[a]</sup> $wR_1 = \sum||F_o| - F_c| / \sum|F_o|$  and  $wR_2 = [\sum w(F_o^2 - F_c^2)^2 / \sum w F_o^4]^{1/2}$  for  $F_o^2 > 2\sigma(F_o^2)$ .

**Table S2.** Atomic coordinates ( $\times 10^{-4}$ ) and equivalent isotropic displacement parameters ( $\text{\AA}^2 \times 10^3$ ) for  $\text{NH}_4(\text{H}_2\text{C}_6\text{N}_7\text{O}_3) \cdot 2\text{H}_2\text{O}$ .

| Atom | <i>x</i>    | <i>y</i>  | <i>z</i>    | $U_{\text{eq}}^{[a]}$ |
|------|-------------|-----------|-------------|-----------------------|
| O1   | 8634.2(8)   | 5230.8(2) | 1090.4(11)  | 22.33(17)             |
| O2   | 1590.4(8)   | 1590.4(8) | 1590.4(8)   | 1590.4(8)             |
| O3   | 5075.1(8)   | 5075.1(8) | 5075.1(8)   | 5075.1(8)             |
| O4   | 3499.3(8)   | 5586.1(2) | -1963.4(11) | 22.03(17)             |
| O5   | 50.7(8)     | 50.7(8)   | 50.7(8)     | 50.7(8)               |
| O6   | 7103.1(8)   | 7269.6(2) | -3388.4(12) | 22.03(16)             |
| O7   | 8652.6(9)   | 6311.1(3) | -1820.1(15) | 24.02(18)             |
| O8   | 9993.8(9)   | 6121.9(3) | 3961.7(16)  | 28.00(19)             |
| O9   | 6992.4(9)   | 5593.5(3) | 6432.3(12)  | 21.62(17)             |
| O10  | 1575.6(9)   | 6901.0(3) | 4030.5(13)  | 22.65(17)             |
| N1   | 6292.4(9)   | 5221.4(3) | 1944.6(12)  | 15.24(17)             |
| N2   | 7565.5(8)   | 5809.0(2) | 1585.8(12)  | 14.63(17)             |
| N3   | 3920.1(9)   | 5196.9(2) | 2894.8(12)  | 15.62(17)             |
| N4   | 5094.0(8)   | 5792.9(2) | 2440.7(11)  | 11.34(17)             |
| N5   | 6371.7(9)   | 6374.5(2) | 2162.0(12)  | 14.62(17)             |
| N6   | 2669.0(9)   | 5787.6(2) | 3225.8(12)  | 15.02(17)             |
| N7   | 3815.5(9)   | 6369.5(2) | 2824.8(12)  | 14.47(17)             |
| N8   | 4799.1(9)   | 6127.7(2) | -2383.7(12) | 14.56(17)             |
| N9   | 2235.9(9)   | 6137.9(2) | -1772.6(12) | 14.67(17)             |
| N10  | 6034.4(9)   | 6693.4(2) | -2822.7(12) | 14.74(17)             |
| N11  | 3566.2(8)   | 6712.7(2) | -1988.9(11) | 11.48(17)             |
| N12  | 1139.1(10)  | 6722.4(2) | -1244.9(13) | 15.57(18)             |
| N13  | 2427.2(9)   | 7309.9(2) | -1432.0(12) | 14.76(17)             |
| N14  | 4798.7(9)   | 7282.5(3) | -2375.5(12) | 15.05(17)             |
| N15  | 8563.7(12)  | 6997.8(3) | 3036.1(18)  | 22.7(2)               |
| N16  | 10029.2(12) | 5476.1(3) | 7384.5(19)  | 20.1(2)               |
| C1   | 7572.4(10)  | 5418.3(3) | 1516.4(14)  | 14.41(19)             |
| C2   | 5060.6(10)  | 5394.9(3) | 2444.5(13)  | 12.00(19)             |
| C3   | 6374.2(10)  | 5997.0(3) | 2061.5(13)  | 11.96(19)             |

| Atom | x          | y         | z           | $U_{\text{eq}}^{[a]}$ |
|------|------------|-----------|-------------|-----------------------|
| C4   | 2674.9(10) | 5388.6(3) | 3357.5(14)  | 15.04(19)             |
| C5   | 3855.8(10) | 5996.8(3) | 2835.5(13)  | 12.10(19)             |
| C6   | 5102.4(10) | 6565.0(3) | 2485.8(13)  | 14.0(2)               |
| C7   | 1144.9(10) | 7120.8(3) | -1082.0(14) | 14.66(19)             |
| C8   | 2302.1(10) | 6510.7(3) | -1679.9(13) | 12.25(18)             |
| C9   | 3552.2(10) | 7110.5(3) | -1905.8(13) | 11.86(19)             |
| C10  | 3519.3(10) | 5941.2(3) | -2045.5(13) | 14.0(2)               |
| C11  | 4831.4(10) | 6507.4(3) | -2415.0(12) | 11.69(19)             |
| C12  | 6048.1(10) | 7083.6(3) | -2892.9(14) | 14.59(19)             |
| H1   | 6338(17)   | 4928(5)   | 1930(20)    | 30(4)                 |
| H6   | 1712(16)   | 5924(5)   | 3500(20)    | 30(4)                 |
| H7a  | 7770(20)   | 6442(5)   | -2280(30)   | 38(4)                 |
| H7b  | 8350(20)   | 6142(6)   | -670(30)    | 50(5)                 |
| H8a  | 9190(20)   | 6012(6)   | 3090(30)    | 39(5)                 |
| H8b  | 9630(30)   | 6217(6)   | 5210(30)    | 69(7)                 |
| H9a  | 6320(20)   | 5781(5)   | 6910(30)    | 39(4)                 |
| H9b  | 6560(20)   | 5337(6)   | 6730(30)    | 44(5)                 |
| H10a | 1985(19)   | 7150(5)   | 3820(20)    | 34(4)                 |
| H10b | 2240(20)   | 6714(5)   | 3510(30)    | 34(4)                 |
| H12  | 190(20)    | 6587(5)   | -1200(20)   | 42(4)                 |
| H14  | 4835(18)   | 7577(5)   | -2410(30)   | 38(4)                 |
| H15a | 7921(18)   | 6757(5)   | 2570(20)    | 26(4)                 |
| H15b | 9620(20)   | 6923(5)   | 3360(30)    | 43(4)                 |
| H15c | 8150(20)   | 7088(6)   | 4310(40)    | 77(7)                 |
| H15d | 8490(30)   | 7193(7)   | 1970(30)    | 75(7)                 |
| H16a | 8930(20)   | 5540(5)   | 7090(20)    | 32(4)                 |
| H16b | 10600(20)  | 5703(6)   | 7810(30)    | 43(4)                 |
| H16c | 10420(30)  | 5398(6)   | 6110(40)    | 70(6)                 |
| H16d | 10130(30)  | 5304(9)   | 8360(40)    | 104(10)               |

<sup>[a]</sup> $U_{\text{eq}}$  is defined as one-third of the trace of the orthogonalized  $U_{ij}$  tensor.

**Table S3.** Anisotropic displacement parameters ( $\text{\AA}^2 \times 10^{-3}$ ) for  $\text{NH}_4(\text{H}_2\text{C}_6\text{N}_7\text{O}_3) \cdot 2\text{H}_2\text{O}$ .

| Atom | $U_{11}$ | $U_{22}$ | $U_{33}$ | $U_{23}$ | $U_{13}$ | $U_{12}$ |
|------|----------|----------|----------|----------|----------|----------|
| O1   | 17.2(4)  | 16.3(4)  | 34.1(4)  | 5.5(3)   | 7.9(3)   | 3.2(3)   |
| O2   | 16.0(3)  | 14.9(3)  | 37.9(4)  | -4.0(3)  | 8.4(3)   | -3.3(3)  |
| O3   | 25.1(4)  | 7.1(3)   | 33.0(4)  | 0.7(3)   | -1.0(3)  | 0.2(3)   |
| O4   | 25.1(4)  | 7.3(3)   | 33.5(4)  | 0.5(3)   | -0.7(3)  | 0.6(3)   |
| O5   | 16.0(3)  | 15.8(3)  | 35.2(4)  | 4.1(3)   | 8.3(3)   | 1.7(3)   |
| O6   | 16.1(3)  | 16.2(4)  | 34.4(4)  | -4.6(3)  | 8.2(3)   | -2.8(3)  |
| O7   | 13.1(4)  | 19.1(4)  | 40.0(5)  | -1.3(3)  | 3.0(3)   | 2.0(4)   |
| O8   | 17.3(4)  | 24.8(4)  | 41.4(5)  | 0.5(3)   | -3.7(4)  | -5.9(4)  |
| O9   | 18.7(4)  | 16.6(4)  | 29.6(4)  | 1.2(3)   | 1.7(3)   | -1.3(3)  |
| O10  | 19.4(4)  | 15.6(4)  | 33.1(4)  | 0.8(4)   | 2.9(3)   | 0.2(4)   |
| N1   | 14.5(4)  | 8.9(4)   | 22.5(4)  | 1.3(3)   | 3.0(3)   | -1.0(3)  |
| N2   | 12.3(4)  | 10.9(4)  | 20.7(4)  | 0.4(3)   | 2.0(3)   | 0.5(3)   |
| N3   | 14.6(4)  | 8.6(4)   | 24.0(4)  | -0.6(3)  | 3.7(3)   | -0.4(3)  |
| N4   | 12.1(4)  | 7.2(4)   | 14.7(4)  | 0.2(3)   | 0.2(3)   | -0.4(3)  |
| N5   | 15.5(4)  | 8.7(4)   | 19.7(4)  | -0.9(3)  | 0.7(3)   | -0.6(3)  |
| N6   | 12.8(4)  | 10.9(4)  | 21.5(4)  | 0.7(3)   | 1.5(3)   | 0.5(3)   |
| N7   | 15.1(4)  | 8.3(4)   | 19.9(4)  | 2.6(3)   | 0.2(3)   | -0.8(3)  |
| N8   | 15.0(4)  | 7.8(4)   | 20.7(4)  | 2.0(3)   | 0.0(3)   | -0.4(3)  |
| N9   | 14.6(4)  | 8.6(4)   | 20.8(4)  | -1.7(3)  | 0.3(3)   | -0.1(3)  |
| N10  | 11.8(4)  | 11.1(4)  | 21.3(4)  | 0.8(3)   | 1.9(3)   | -0.3(3)  |
| N11  | 11.2(4)  | 7.1(4)   | 16.1(4)  | -0.0(3)  | 0.7(3)   | -0.2(3)  |
| N12  | 12.2(4)  | 12.0(4)  | 22.7(4)  | -0.3(3)  | 2.7(3)   | -0.3(3)  |
| N13  | 14.1(4)  | 8.1(4)   | 22.3(4)  | 1.2(3)   | 3.9(3)   | -0.8(3)  |
| N14  | 13.5(4)  | 9.5(4)   | 22.4(4)  | -1.1(3)  | 3.3(3)   | -0.3(3)  |
| N15  | 17.6(5)  | 18.2(5)  | 32.5(6)  | -2.8(4)  | 3.9(4)   | 0.1(4)   |
| N16  | 16.6(5)  | 16.9(5)  | 27.0(6)  | -1.0(4)  | 4.6(4)   | 3.1(4)   |
| C1   | 13.9(4)  | 11.5(4)  | 18.1(4)  | 2.2(4)   | 2.4(3)   | 1.3(3)   |
| C2   | 13.0(4)  | 8.0(4)   | 15.0(4)  | 0.0(3)   | 0.7(3)   | -0.2(3)  |
| C3   | 12.2(4)  | 9.0(4)   | 14.7(4)  | -0.5(3)  | -0.1(3)  | 0.0(3)   |
| C4   | 14.1(4)  | 11.1(4)  | 20.0(4)  | -1.6(4)  | 1.8(3)   | -1.0(4)  |



| Atom | <i>U</i> 11 | <i>U</i> 22 | <i>U</i> 33 | <i>U</i> 23 | <i>U</i> 13 | <i>U</i> 12 |
|------|-------------|-------------|-------------|-------------|-------------|-------------|
| C5   | 12.5(4)     | 9.7(4)      | 13.9(4)     | 1.3(3)      | -0.7(3)     | -0.6(3)     |
| C6   | 17.5(5)     | 8.2(5)      | 16.2(4)     | 0.0(4)      | -2.1(3)     | -0.2(3)     |
| C7   | 13.2(4)     | 11.8(4)     | 19.1(4)     | 1.9(4)      | 1.7(3)      | 0.5(3)      |
| C8   | 13.2(4)     | 8.4(4)      | 15.0(4)     | -0.4(3)     | -0.4(3)     | 0.0(3)      |
| C9   | 12.2(4)     | 8.2(4)      | 15.2(4)     | 0.1(3)      | 0.8(3)      | -0.9(3)     |
| C10  | 17.3(5)     | 8.5(4)      | 16.1(4)     | 0.0(3)      | -1.8(3)     | -0.5(3)     |
| C11  | 12.3(4)     | 8.5(4)      | 14.2(4)     | 1.0(3)      | -0.7(3)     | -0.4(3)     |
| C12  | 13.2(4)     | 11.6(4)     | 19.0(4)     | -1.3(4)     | 1.4(3)      | -0.5(4)     |
| H1   | 36(10)      | 24(10)      | 30(8)       | 5(7)        | 10(7)       | 0(7)        |
| H6   | 15(8)       | 39(10)      | 36(9)       | 1(8)        | 4(7)        | 5(8)        |
| H7a  | 32(11)      | 38(12)      | 43(10)      | 5(9)        | 4(8)        | 16(9)       |
| H7b  | 33(11)      | 59(14)      | 58(12)      | 3(10)       | 18(9)       | 19(11)      |
| H8a  | 20(10)      | 60(14)      | 35(10)      | -3(10)      | -17(8)      | -19(9)      |
| H8b  | 92(19)      | 38(13)      | 77(15)      | 25(12)      | 9(13)       | -13(12)     |
| H9a  | 39(11)      | 31(10)      | 48(11)      | 3(10)       | 3(9)        | -2(9)       |
| H9b  | 27(11)      | 55(14)      | 49(12)      | -8(10)      | -9(9)       | 0(11)       |
| H10a | 39(11)      | 33(10)      | 30(9)       | 8(9)        | 9(7)        | 1(8)        |
| H10b | 37(10)      | 19(9)       | 46(11)      | 13(9)       | 10(8)       | -3(8)       |
| H12  | 52(12)      | 48(11)      | 27(8)       | 16(10)      | 14(8)       | 5(8)        |
| H14  | 37(10)      | 23(10)      | 54(11)      | -10(8)      | 6(8)        | -6(8)       |
| H15a | 27(8)       | 15(6)       | 36(9)       | -6(3)       | -6(6)       | 3(4)        |
| H15b | 38(11)      | 40(11)      | 52(11)      | 0(9)        | 5(8)        | -10(9)      |
| H15c | 62(15)      | 40(13)      | 130(20)     | 6(11)       | 5(15)       | -31(14)     |
| H15d | 88(18)      | 63(15)      | 71(14)      | 3(13)       | -24(12)     | 33(13)      |
| H16a | 30(11)      | 40(11)      | 25(9)       | 1(9)        | -3(7)       | -4(8)       |
| H16b | 50(12)      | 36(10)      | 43(10)      | 0(10)       | 9(8)        | 0(9)        |
| H16c | 75(16)      | 62(15)      | 73(14)      | -15(13)     | 6(12)       | -12(12)     |
| H16d | 73(17)      | 150(30)     | 90(18)      | -26(18)     | -17(14)     | 36(18)      |

**Table S4.** Selected bond lengths (Å) for NH<sub>4</sub>(H<sub>2</sub>C<sub>6</sub>N<sub>7</sub>O<sub>3</sub>)·2H<sub>2</sub>O.

| Selected bonds | Length (Å) | Selected bonds | Length (Å) |
|----------------|------------|----------------|------------|
| O1–C1          | 1.2186(12) | N10–C11        | 1.3214(12) |
| O3–C6          | 1.2337(13) | N10–C12        | 1.3595(13) |
| O2–C4          | 1.2183(12) | N9–C8          | 1.3008(12) |
| O5–C7          | 1.2124(12) | N9–C10         | 1.3857(12) |
| O6–C12         | 1.2229(12) | N7–C5          | 1.2980(13) |
| O4–C10         | 1.2375(12) | N7–C6          | 1.3942(12) |
| N11–C8         | 1.3837(12) | N6–C5          | 1.3480(13) |
| N11–C9         | 1.3861(12) | N6–C4          | 1.3918(12) |
| N11–C11        | 1.4062(12) | N14–C9         | 1.3429(12) |
| N4–C3          | 1.4089(12) | N14–C12        | 1.3976(12) |
| N4–C2          | 1.3859(12) | N3–C2          | 1.3013(13) |
| N4–C5          | 1.3782(12) | N3–C4          | 1.3726(12) |
| N12–C8         | 1.3415(12) | N8–C11         | 1.3224(13) |
| N12–C7         | 1.3910(13) | N8–C10         | 1.3732(13) |
| N2–C3          | 1.3266(12) | N13–C9         | 1.2962(12) |
| N2–C1          | 1.3611(13) | N13–C7         | 1.3811(12) |
| N5–C3          | 1.3160(13) | N1–C2          | 1.3389(12) |
| N5–C6          | 1.3698(12) | N1–C1          | 1.4034(12) |

**Table S5.** Selected bond angles (°) for NH<sub>4</sub>(H<sub>2</sub>C<sub>6</sub>N<sub>7</sub>O<sub>3</sub>)·2H<sub>2</sub>O.

| Selected bond angles | Angle (°) | Selected bond angles | Angle (°) |
|----------------------|-----------|----------------------|-----------|
| C8–N11–C9            | 119.54(8) | N7–C5–N4             | 122.54(9) |
| C8–N11–C11           | 118.80(8) | N7–C5–N6             | 121.19(9) |
| C9–N11–C11           | 121.66(8) | N6–C5–N4             | 116.27(8) |
| C2–N4–C3             | 121.57(8) | N14–C9–N11           | 115.30(8) |
| C5–N4–C3             | 118.69(8) | N13–C9–N11           | 123.58(8) |
| C5–N4–C2             | 119.74(8) | N13–C9–N14           | 121.11(9) |
| C8–N12–C7            | 124.27(9) | N10–C11–N11          | 120.08(9) |
| C3–N2–C1             | 120.38(8) | N8–C11–N11           | 119.07(8) |
| C3–N5–C6             | 119.64(8) | N8–C11–N10           | 120.85(9) |
| C11–N10–C12          | 120.38(8) | O3–C6–N5             | 119.86(9) |
| C8–N9–C10            | 117.42(8) | O3–C6–N7             | 118.33(9) |
| C5–N7–C6             | 117.68(8) | N5–C6–N7             | 121.80(9) |
| C5–N6–C4             | 123.35(9) | O6–C12–N10           | 123.12(9) |
| C9–N14–C12           | 123.80(9) | O6–C12–N14           | 118.31(9) |
| C2–N3–C4             | 118.91(8) | N10–C12–N14          | 118.57(9) |
| C11–N8–C10           | 119.68(8) | O5–C7–N12            | 119.98(9) |
| C9–N13–C7            | 118.92(8) | O5–C7–N13            | 122.40(9) |
| C2–N1–C1             | 123.87(9) | N13–C7–N12           | 117.62(8) |
| N12–C8–N11           | 115.96(8) | O4–C10–N9            | 118.29(9) |
| N9–C8–N11            | 122.60(9) | O4–C10–N8            | 119.58(9) |
| N9–C8–N12            | 121.43(9) | N8–C10–N9            | 122.13(9) |
| N2–C3–N4             | 120.04(9) | O1–C1–N2             | 123.22(9) |
| N5–C3–N4             | 119.47(8) | O1–C1–N1             | 118.31(9) |
| N5–C3–N2             | 120.49(9) | N2–C1–N1             | 118.47(8) |
| N3–C2–N4             | 123.26(9) | O2–C4–N6             | 119.75(9) |
| N3–C2–N1             | 121.17(9) | O2–C4–N3             | 122.02(9) |
| N1–C2–N4             | 115.57(8) | N3–C4–N6             | 118.24(9) |

## References

- 1 Horvath-Bordon, E. *et al.* Alkalicyanamides,  $M_3C_6N_7O_3 \cdot xH_2O$ ,  $M = Li, Na, K, Rb, Cs$ : UV-luminescent and thermally very stable ionic tri-s-triazine derivatives. *Dalton Trans.* 3900-3908 (2004).
- 2 Sattler, A. & Schnick, W. Zur Frage der Tautomerie von Cyanamidsäure im Kristall. *Z. Anorg. Allg. Chem.* **632**, 1518-1523 (2006).
- 3 Dolomanov, O. V., Bourhis, L. J., Gildea, R. J., Howard, J. A. K. & Puschmann, H. OLEX2: a complete structure solution, refinement and analysis program. *J. Appl. Crystallogr.* **42**, 339-341 (2009).
- 4 Bourhis, L. J., Dolomanov, O. V., Gildea, R. J., Howard, J. A. K. & Puschmann, H. The anatomy of a comprehensive constrained, restrained refinement program for the modern computing environment-Olex2 dissected. *Acta Crystallogr., Sect. A: Found. Adv.* **71**, 59-75 (2015).
- 5 Sheldrick, G. M. A short history of SHELX. *Acta Crystallogr., Sect. A: Found. Adv.* **64**, 112-122 (2008).
- 6 Kleemiss, F. *et al.* Accurate crystal structures and chemical properties from NoSpherA2. *Chem. Sci.* **12**, 1675-1692 (2021).
- 7 Spek, A. L. Single-crystal structure validation with the program PLATON. *J. Appl. Crystallogr.* **36**, 7-13 (2003).
- 8 Tauc, J. Absorption edge and internal electric fields in amorphous semiconductors. *Mater. Res. Bull.* **5**, 721-729 (1970).
- 9 Cao, L. *et al.* A microcrystal method for the measurement of birefringence. *Crystengcomm* **22**, 1956-1961 (2020).
- 10 Sorensen, B. E. A revised Michel-Levy interference colour chart based on first-principles calculations. *Eur. J. Mineral.* **25**, 5-10 (2013).
- 11 Clark, S. J. *et al.* First principles methods using CASTEP. *Z. Kristallogr.* **220**, 567-570 (2005).

- 12 Payne, M. C., Teter, M. P., Allan, D. C., Arias, T. A. & Joannopoulos, J. D. Iterative minimization techniques for ab initio total-energy calculations: molecular dynamics and conjugate gradients. *Rev. Mod. Phys.* **64**, 1045-1097 (1992).
- 13 Kohn, W. & Sham, L. J. Self-Consistent Equations Including Exchange and Correlation Effects. *Phys. Rev.* **140**, 1133-& (1965).
- 14 Perdew, J. P., Burke, K. & Ernzerhof, M. Generalized Gradient Approximation Made Simple. *Phys. Rev. Lett.* **77**, 3865-3868 (1996).
- 15 Pfrommer, B. G., Cote, M., Louie, S. G. & Cohen, M. L. Relaxation of crystals with the quasi-Newton method. *J. Comput. Phys.* **131**, 233-240 (1997).
- 16 Rappe, A. M., Rabe, K. M., Kaxiras, E. & Joannopoulos, J. D. Optimized pseudopotentials. *Phys. Rev. B* **41**, 1227-1230 (1990).
- 17 Monkhorst, H. J. & Pack, J. D. Special points for Brillouin-zone integrations. *Phys. Rev. B* **13**, 5188-5192 (1976).
- 18 Frisch, M. J. *et al.* Gaussian 09, R. B. Gaussian, Inc., Wallingford CT (2009).
- 19 Lu, T. & Chen, F. Multiwfn: A multifunctional wavefunction analyzer. *J. Comput. Chem.* **33**, 580-592 (2012).
